# Supplementary material for: A combined H3PO4 activation and boron templating process for easy synthesis of highly porous, spherical activated carbons as a superior adsorbent for rhodamine B
Source: Royal Society of Chemistry journal article supplement (doi:10.1039/c5ra23834j), 2016-01-01
Supplement: c5ra23834j1.pdf [file c5ra23834j1.pdf]

## Supplementary information

### A combined H<sub>3</sub>PO<sub>4</sub> activation and boron templating process for facile synthesis of highly porous spherical activated carbons as superior adsorbent for rhodamine B

Zhimin Zou<sup>a,b</sup>, Yong Zhang<sup>b</sup>, Houan Zhang<sup>b</sup>, Chunhai Jiang<sup>a,b,\*</sup>

<sup>a</sup> Institute of Advanced Energy Materials, School of Materials Science & Engineering, Xiamen University of Technology, 600 Ligong Road, Jimei District, Xiamen 361024, Fujian, China

<sup>b</sup> School of Materials Science & Engineering, Xiamen University of Technology, 600 Ligong Road, Jimei District, Xiamen 361024, Fujian, China

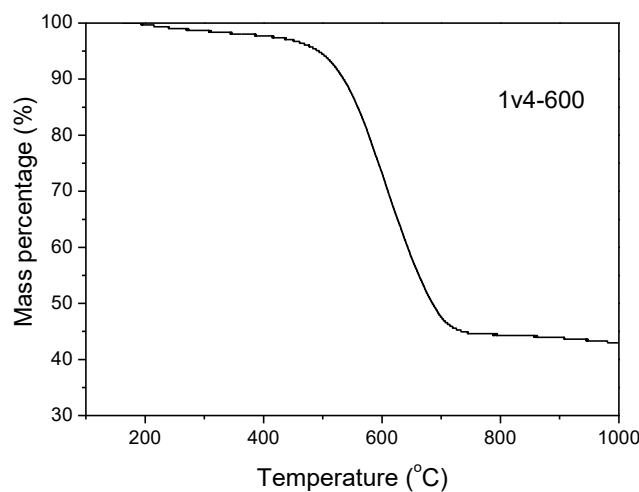

Fig. S1. TG curve of sample 1v4-600. The estimated mass ratio of carbon in 1v4-600 was about 55.7%.

---

\*Corresponding author

E-mail: chjiang@xmut.edu.cn

Tel. & Fax: +86-592-6291693
